# Supplementary material for: The Hsp70–Bag3 complex modulates the phosphorylation and nuclear translocation of Hippo pathway protein Yap
Source: Oxford University Press journal article supplement (doi:10.1242/jcs.259107), 2021-11-11
Supplement: jcs259107supp.pdf [file jcs259107supp.pdf]

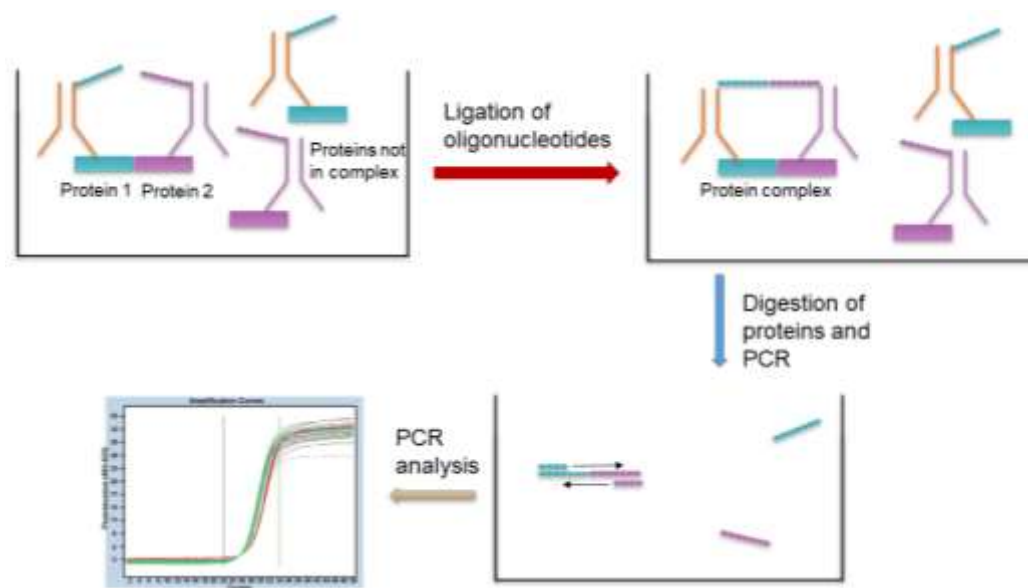

**Fig. S1. Proximity Ligation Assay Scheme.** See explanations in the Materials and Methods.

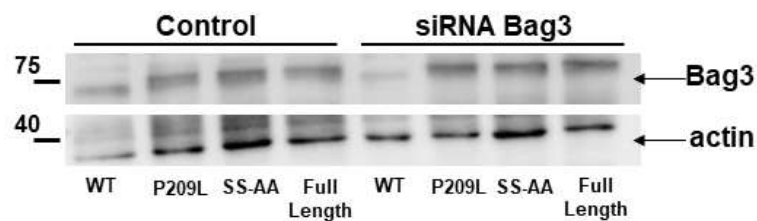

**Fig. S2. Constructs expression and Bag3 depletion.** Expression level of the construct P209L, SS-AA and Full Length Bag3 in MCF10A compare to the WT. Depletion of Bag3 in the WT and constructs.

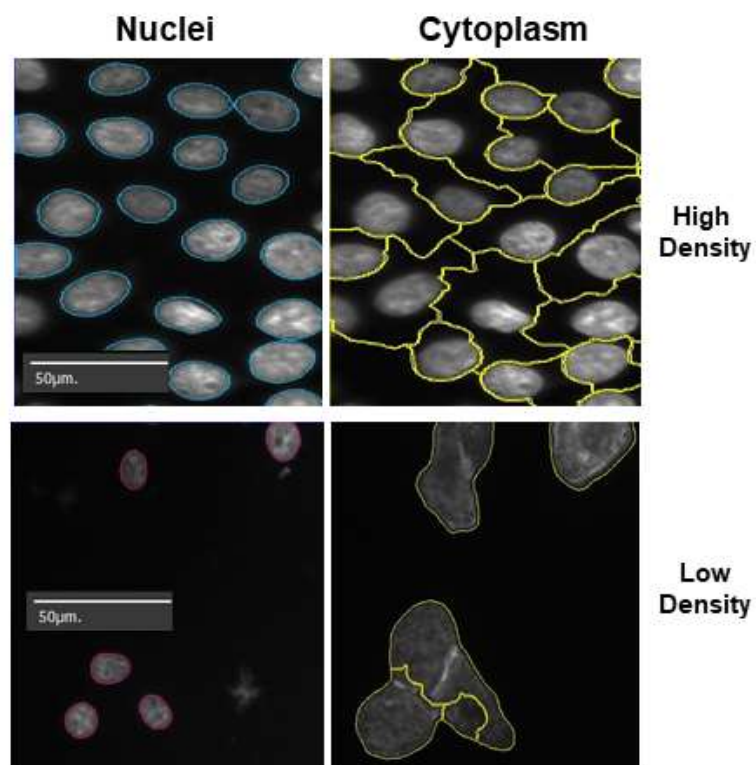

**Fig. S3. Masking analysis.** Example of the masking performed by the software WiSoft® Athena software Translocation Application (IDEA Bio-medical, Rehovot, Israel).

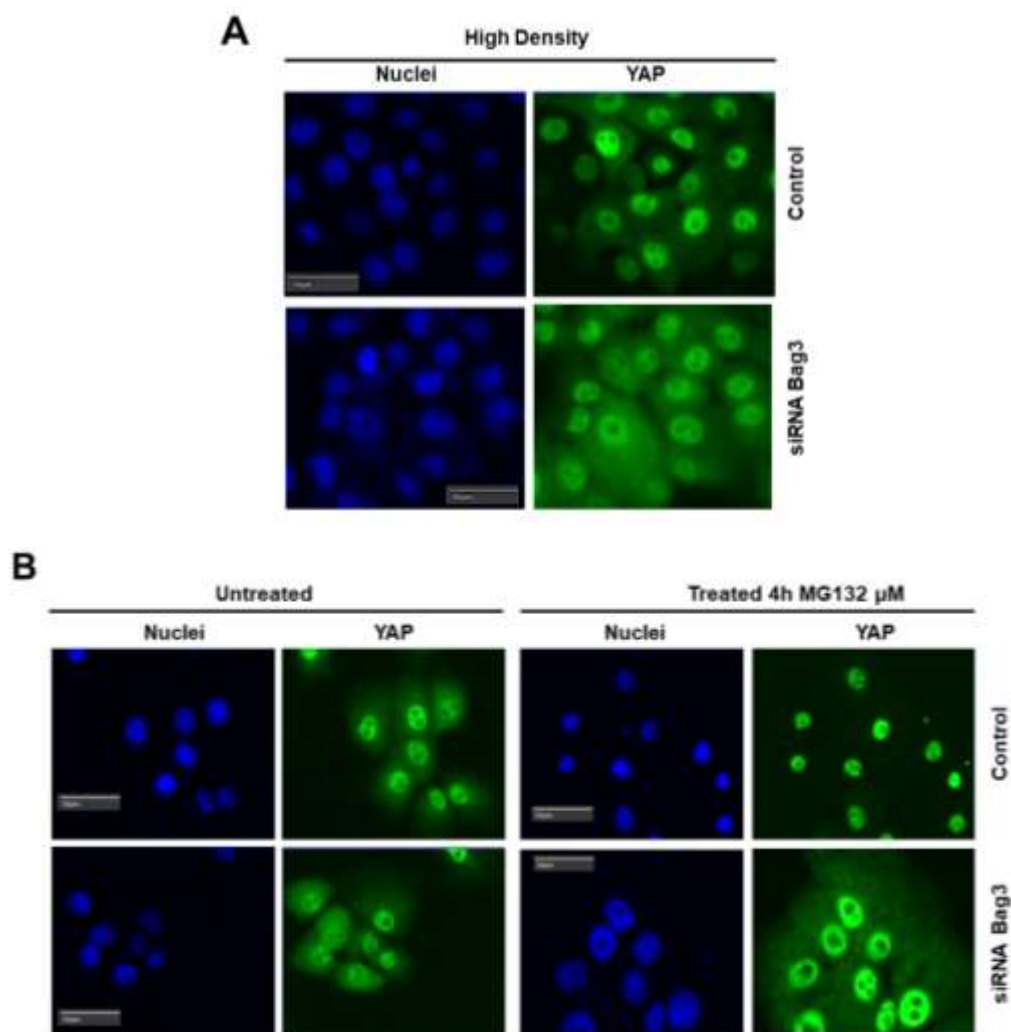

**Fig. S4. Masking analysis.** A. Representative image of localization of YAP with and without depletion of Bag3 in Figure 7E. B. Representative image of localization of YAP with and without depletion of Bag3 and in the presence and absence of MG132 in Figure 3B.
